# Supplementary material for: Robotic Abdominal Surgery and COVID-19: A Systematic Review of Published Literature and Peer-Reviewed Guidelines during the SARS-CoV-2 Pandemic
Source: MDPI journal article supplement (doi:10.3390/jcm11112957), 2022-05-24
Supplement: s1 [file s1]

## Supplementary Data

### Supplementary Data S1: Search String

'robotic surgery' OR 'robotics' OR 'robotic' AND 'COVID-19' OR 'COVID' OR 'SARS-CoV-2'

### Supplementary Table S1: ROBINS-I Risk of Bias assessment for surgical practice of robotic surgery studies

| Study Author and Year | Overall Bias | Confounding Variables | Participant selection | Classification of interventions | Deviation from Intention to Treat | Incomplete Data | Measurement of Outcomes | Selective Reporting |
|-----------------------|--------------|-----------------------|-----------------------|---------------------------------|-----------------------------------|-----------------|-------------------------|---------------------|
| Abaza 2021            | Low          | Low                   | Moderate              | Low                             | Low                               | Low             | Moderate                | Low                 |
| Abou-Chedid 2021      | Moderate     | Moderate              | Low                   | Moderate                        | Moderate                          | Moderate        | Moderate                | Moderate            |
| Blanc 2021            | Low          | Low                   | Low                   | Moderate                        | Low                               | Low             | Moderate                | Low                 |
| Busetto 2020          | Low          | Low                   | Low                   | Moderate                        | Low                               | Low             | Moderate                | Low                 |
| Evans 2020            | Low          | Low                   | Low                   | Low                             | Low                               | Low             | Low                     | Low                 |
| Harke 2020            | Moderate     | Moderate              | Moderate              | Low                             | Low                               | Low             | Moderate                | Low                 |
| Huddy 2021            | Low          | Low                   | Low                   | Low                             | Moderate                          | Low             | Low                     | Low                 |
| Minerva 2021          | Low          | Low                   | Low                   | Moderate                        | Low                               | Low             | Low                     | Low                 |
| Moschovas 2021        | Low          | Low                   | Low                   | Moderate                        | Low                               | Low             | Low                     | Low                 |
| Motterle 2020         | Low          | Low                   | Low                   | Low                             | Low                               | Low             | Low                     | Low                 |
| Özdemir 2021          | Low          | Low                   | Low                   | Low                             | Low                               | Low             | Moderate                | Low                 |
| Sobrado 2021          | Low          | Low                   | Low                   | Moderate                        | Low                               | Low             | Moderate                | Low                 |
| Sparwasser 2021       | Low          | Low                   | Low                   | Moderate                        | Low                               | Low             | Moderate                | Low                 |
| Tabourin 2020         | Low          | Low                   | Low                   | Moderate                        | Low                               | Low             | Moderate                | Moderate            |
| Teixeira 2021         | Moderate     | Moderate              | Moderate              | Moderate                        | Moderate                          | Moderate        | Moderate                | Moderate            |

|              |
|--------------|
| Low          |
| Moderate     |
| High         |
| Not Reported |

**Supplementary Table S2:** Completed scores following AGREE-II assessment of included guideline and recommendation articles with break down into each domain. A total score of 161 is possible with potential domain totals as follows: D1 21, D2 21, D3 56, D4 21, D5 28, D6 14.

| Study                 | Domain 1:<br>Scope<br>and<br>Purpose | Domain 2:<br>Stakeholder<br>Involvement | Domain 3:<br>Rigour of<br>Development | Domain 4 :<br>Clarity of<br>Presentation | Domain 5:<br>Applicability | Domain 6:<br>Editorial<br>Independence | AGREE II<br>Score<br>(Total) |
|-----------------------|--------------------------------------|-----------------------------------------|---------------------------------------|------------------------------------------|----------------------------|----------------------------------------|------------------------------|
| Emile 2020            | 16                                   | 3                                       | 37                                    | 12                                       | 15                         | 12                                     | 95                           |
| Gallo 2020            | 17                                   | 6                                       | 42                                    | 18                                       | 19                         | 11                                     | 113                          |
| Gonzalez-Bonilla 2020 | 18                                   | 7                                       | 39                                    | 18                                       | 21                         | 12                                     | 115                          |
| Heidwein 2020         | 20                                   | 6                                       | 48                                    | 19                                       | 21                         | 11                                     | 125                          |
| Kimmig 2020           | 19                                   | 9                                       | 33                                    | 16                                       | 13                         | 11                                     | 101                          |
| Mun 2021              | 20                                   | 8                                       | 50                                    | 18                                       | 15                         | 10                                     | 121                          |
| Navarra 2020          | 19                                   | 6                                       | 39                                    | 17                                       | 13                         | 11                                     | 105                          |
| Poon 2021             | 19                                   | 8                                       | 48                                    | 14                                       | 14                         | 10                                     | 113                          |
| Porter 2020           | 16                                   | 7                                       | 46                                    | 13                                       | 12                         | 11                                     | 105                          |
| Sanchez-Guillen 2021  | 15                                   | 8                                       | 41                                    | 17                                       | 11                         | 9                                      | 101                          |
| Somashekhar 2021      | 18                                   | 11                                      | 52                                    | 12                                       | 16                         | 12                                     | 121                          |
| Tommaselli 2021       | 16                                   | 8                                       | 42                                    | 12                                       | 10                         | 9                                      | 97                           |
| Vigneswaran 2020      | 17                                   | 6                                       | 38                                    | 10                                       | 14                         | 11                                     | 96                           |
| Zampolli 2020         | 16                                   | 5                                       | 36                                    | 12                                       | 13                         | 10                                     | 92                           |
